# Supplementary material for: Two new energetic coordination compounds based on tetrazole-1-acetic acid: syntheses, crystal structures and their synergistic catalytic effect for the thermal decomposition of ammonium perchlorate
Source: Royal Society of Chemistry journal article supplement (doi:10.1039/c6ra02034h), 2016-01-01
Supplement: c6ra02034h1.pdf [file c6ra02034h1.pdf]

# Two new energetic coordination compounds based on Tetrazole-1-acetic acid: Syntheses, crystal structures and their synergistic catalytic effect for thermal decomposition of ammonium perchlorate

Li Kang<sup>b</sup>, Zhixian Wei<sup>a\*</sup>, Jiangfeng Song<sup>b\*</sup>, Yuanyuan Qu<sup>b</sup>, Yale Wang<sup>b</sup>

Fig.S1. Experimental and simulated powder XRD patterns of compounds 1(a) and 2(b).

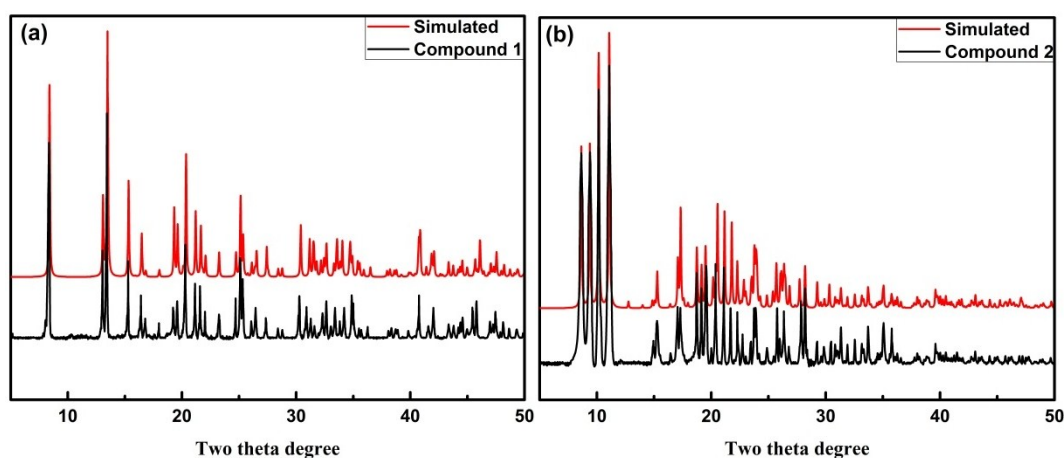

Table S1 Crystal data and structure refinement for coordination compounds 1 and 2

| Compound          | 1                                                              | 2                                                                               |
|-------------------|----------------------------------------------------------------|---------------------------------------------------------------------------------|
| Empirical formula | C <sub>5</sub> H <sub>7</sub> Bi N <sub>4</sub> O <sub>8</sub> | C <sub>18</sub> H <sub>24</sub> Fe <sub>3</sub> N <sub>25</sub> O <sub>19</sub> |
| Formula weight    | 460.13                                                         | 1060.16                                                                         |
| Temperature       | 293(2) K                                                       | 293(2) K                                                                        |
| Wavelength        | 0.71073 Å                                                      | 0.71073 Å                                                                       |
| Crystal system    | Orthorhombic                                                   | Monoclinic                                                                      |
| Space group       | <i>Pbca</i>                                                    | <i>C2/c</i>                                                                     |

\*Corresponding authors. <sup>a</sup>Department of Chemistry, Science Institute, North University of China, Taiyuan, Shanxi 030051, P. R. China; <sup>b</sup> School of Chemical and Environmental Engineering, North University of China, Taiyuan, Shanxi 030051, P. R. China; Tel. / fax: +86 0351 3921414. E-mail addresses: zx\_wei@126.com (Zhixian Wei), jfsong0129@nuc.edu.cn (Jiangfeng Song)

|                                                    |                                                                     |                                                                     |
|----------------------------------------------------|---------------------------------------------------------------------|---------------------------------------------------------------------|
| $a(\text{\AA})$                                    | 8.8215(8)                                                           | 12.0154(13)                                                         |
| $b(\text{\AA})$                                    | 11.1197(10)                                                         | 20.745(2)                                                           |
| $c(\text{\AA})$                                    | 21.054(2)                                                           | 16.311(2)                                                           |
| $\alpha$ (°)                                       | 90                                                                  | 90                                                                  |
| $\beta$ (°)                                        | 90                                                                  | 102.087(3)                                                          |
| $\gamma$ (°)                                       | 90                                                                  | 90                                                                  |
| $V(\text{\AA}^3)$                                  | 2065.2(3)                                                           | 3975.4(8)                                                           |
| $Z$                                                | 8                                                                   | 4                                                                   |
| $\rho(\text{cald.})(\text{Mg/m}^3)$                | 2.960                                                               | 1.771                                                               |
| $\mu(\text{mm}^{-1})$                              | 17.122                                                              | 1.187                                                               |
| $F(000)$                                           | 2730                                                                | 2140                                                                |
| Theta range for data collection(°)                 | 3.01 to 27.56                                                       | 1.96 to 27.54                                                       |
| $h/k/l$                                            | -11 $\leq h \leq$ 11,-13 $\leq k \leq$ 14, -<br>27 $\leq l \leq$ 22 | -15 $\leq h \leq$ 15,-22 $\leq k \leq$ 26, -<br>21 $\leq l \leq$ 21 |
| Reflections collected / unique                     | 18500 / 2381 [R(int) =<br>0.0586]                                   | 18716 / 4565 [R(int) =<br>0.0469]                                   |
| Completeness to theta = 27.56                      | 99.6 %                                                              | 99.4 %                                                              |
| Data/restraints/parameters                         | 2381 / 3 / 183                                                      | 4565 / 0 / 293                                                      |
| Goodness-of-fit on $F^2$                           | 1.054                                                               | 1.107                                                               |
| Final $R$ indices [ $I > 2\sigma(I)$ ]             | $R_1 = 0.0327$ , $wR_2 =$<br>0.0805                                 | $R_1 = 0.0499$ , $wR_2 =$<br>0.1373                                 |
| $R$ indices (all data)                             | $R_1 = 0.0404$ , $wR_2 =$<br>=0.0846                                | $R_1 = 0.0767$ , $wR_2 =$<br>0.1597                                 |
| Largest diff. peak and hole( $e.\text{\AA}^{-3}$ ) | 2.015 and -2.538                                                    | 1.027 and -1.002                                                    |

Table S2 Selected Bond Distances ( $\text{\AA}$ ) and Angles (°) for coordination compounds 1 and 2

| Compound 1 |          |             |          |
|------------|----------|-------------|----------|
| Bi(1)-O(5) | 2.362(4) | Bi(1)-O(1W) | 2.558(4) |
| Bi(1)-O(1) | 2.399(4) | Bi(1)-O(4)i | 2.604(4) |

|                      |            |                    |            |
|----------------------|------------|--------------------|------------|
| Bi(1)-O(6)           | 2.475(4)   | Bi(1)-O(2)         | 2.648(4)   |
| Bi(1)-O(3)i          | 2.505(4)   | Bi(1)-O(6)iii      | 2.670(3)   |
| Bi(1)-N(2)ii         | 2.551(5)   |                    |            |
| N(2)ii-Bi(1)-O(6)iii | 142.19(14) | O(6)-Bi(1)-O(3) i  | 108.38(12) |
| O(1W)-Bi(1)-O(6)iii  | 81.67(13)  | O(5)-Bi(1)-N(2)ii  | 77.95(14)  |
| O(4)i-Bi(1)-O(6)iii  | 71.78(12)  | O(1)-Bi(1)-N(2)ii  | 77.23(15)  |
| O(2)-Bi(1)-O(6)iii   | 70.77(13)  | O(6)-Bi(1)-N(2)ii  | 142.39(14) |
| O(5)-Bi(1)-O(1)      | 75.15(14)  | O(3)i-Bi(1)-N(2)ii | 71.62(13)  |
| O(5)-Bi(1)-O(6)      | 67.82(11)  | O(5)-Bi(1)-O(1W)   | 145.40(14) |
| O(1)-Bi(1)-O(6)      | 79.31(14)  | O(1)-Bi(1)-O(1W)   | 122.49(14) |
| O(5)-Bi(1)-O(3)i     | 69.30(16)  | O(6)-Bi(1)-O(1W)   | 139.68(14) |
| O(1)-Bi(1)-O(3) i    | 136.50(14) | O(3)i-Bi(1)-O(1W)  | 79.75(14)  |
| O(4)i-Bi(1)-O(2)     | 132.21(12) | N(2)ii-Bi(1)-O(1W) | 77.93(15)  |
| O(5)-Bi(1)-O(6)iii   | 131.51(13) | O(5)-Bi(1)-O(4)i   | 104.36(14) |
| O(1)-Bi(1)-O(6)iii   | 87.65(14)  | O(1)-Bi(1)-O(4)i   | 152.21(14) |
| O(6)-Bi(1)-O(6)iii   | 64.53(12)  | O(6)-Bi(1)-O(4)i   | 75.07(16)  |
| O(3)i-Bi(1)-O(6)iii  | 134.99(13) | O(3)i-Bi(1)-O(4)i  | 63.78(11)  |
| O(4)i-Bi(1)-O(2)     | 132.21(12) | N(2)ii-Bi(1)-O(4)i | 130.33(14) |
| O(5)-Bi(1)-O(6)iii   | 131.51(13) | O(1W)-Bi(1)-O(4)i  | 73.85(15)  |
| O(3)i-Bi(1)-O(2)     | 138.42(12) | O(5)-Bi(1)-O(2)    | 122.61(13) |
| N(2)ii-Bi(1)-O(2)    | 72.83(14)  | O(1)-Bi(1)-O(2)    | 50.98(13)  |
| O(1W)-Bi(1)-O(2)     | 72.32(13)  | O(6)-Bi(1)-O(2)    | 112.89(12) |

Symmetry transformations used to generate equivalent atoms: i:  $x+1/2, -y+3/2, -z$ ; ii  $-x+2, y+1/2, -z+1/2$ ; iii  $-x+2, -y+1, -z$ ;

---

Compound 2

|            |          |            |          |
|------------|----------|------------|----------|
| O(7)-Fe(1) | 2.018(3) | Fe(1)-O(4) | 2.058(3) |
| O(8)-Fe(1) | 1.898(3) | Fe(2)-O(2) | 1.997(3) |

|                   |            |                  |            |
|-------------------|------------|------------------|------------|
| O(8)-Fe(2) i      | 1.9216(16) | Fe(2)-O(9)       | 2.006(3)   |
| O(8)-Fe(2)        | 1.9216(16) | Fe(2)-O(1)i      | 2.007(3)   |
| Fe(1)-O(6)i       | 2.041(2)   | Fe(2)-O(3)       | 2.014(3)   |
| Fe(1)-O(6)        | 2.041(2)   | Fe(2)-O(5)       | 2.023(2)   |
| Fe(1)-O(4)i       | 2.058(3)   | O(1)-Fe(2)i      | 2.007(3)   |
| Fe(1)-O(8)-Fe(2)i | 120.61(8)  | O(8)-Fe(2)-O(1)i | 93.37(10)  |
| Fe(1)-O(8)-Fe(2)  | 120.61(8)  | O(2)-Fe(2)-O(1)i | 91.00(13)  |
| Fe(2)i-O(8)-Fe(2) | 118.79(15) | O(9)-Fe(2)-O(1)i | 83.57(12)  |
| O(8)-Fe(1)-O(7)   | 180.000(1) | O(8)-Fe(2)-O(3)  | 92.89(9)   |
| O(8)-Fe(1)-O(6)i  | 97.14(7)   | O(2)-Fe(2)-O(3)  | 169.32(11) |
| O(7)-Fe(1)-O(6)i  | 82.86(7)   | O(9)-Fe(2)-O(3)  | 84.42(12)  |
| O(8)-Fe(1)-O(6)   | 97.14(7)   | O(1)i-Fe(2)-O(3) | 91.28(13)  |
| O(7)-Fe(1)-O(6)   | 82.86(7)   | O(8)-Fe(2)-O(5)  | 96.71(9)   |
| O(6)i-Fe(1)-O(6)  | 165.71(14) | O(2)-Fe(2)-O(5)  | 89.59(12)  |
| O(8)-Fe(1)-O(4)i  | 91.83(7)   | O(9)-Fe(2)-O(5)  | 86.27(12)  |
| O(7)-Fe(1)-O(4)i  | 88.17(7)   | O(1)i-Fe(2)-O(5) | 169.75(11) |
| O(6)i-Fe(1)-O(4)i | 91.78(11)  | O(6)i-Fe(1)-O(4) | 87.77(11)  |
| O(6)-Fe(1)-O(4)i  | 87.77(11)  | O(6)-Fe(1)-O(4)  | 91.78(11)  |
| O(8)-Fe(1)-O(4)   | 91.83(7)   | O(4)i-Fe(1)-O(4) | 176.34(14) |
| O(7)-Fe(1)-O(4)   | 88.17(7)   | O(8)-Fe(2)-O(2)  | 97.40(10)  |
| O(2)-Fe(2)-O(9)   | 85.47(12)  | O(8)-Fe(2)-O(9)  | 175.86(11) |

Symmetry transformations used to generate equivalent atoms: i:  $-x+1, y, -z+1/2$

---

Table S3 Hydrogen bond interactions in **2**

---

| D-H...A     | D...A(Å) |
|-------------|----------|
| O9-H5...N8  | 2.735    |
| O7-H2...N4  | 2.748    |
| O9-H6...N11 | 2.666    |

---
